# Supplementary material for: From (NH4)3[Zr(PO4)2F] to (NH4)3[Sn2(PO4)2]Cl: the rational design of a tin-based short-wave ultraviolet phosphate with large optical anisotropy
Source: Royal Society of Chemistry journal article supplement (doi:10.1039/d3qi02561f), 2024-01-01

## Supporting Information

### From $(\text{NH}_4)_3[\text{Zr}(\text{PO}_4)_2\text{F}]$ to $(\text{NH}_4)_3[\text{Sn}_2(\text{PO}_4)_2]\text{Cl}$ : Rational Design of a Tin-based Short-Wave Ultraviolet Phosphate with Large Optical Anisotropy

Zhi Fang<sup>a, c</sup>, Wen-Hua Ma<sup>b</sup>, Qiu-Yu Chen<sup>b</sup>, Xin-Ting Zhu<sup>a</sup>, Xin-Mei Zeng<sup>a</sup>, Pei-Bei Li<sup>a</sup>, Qian-Fen Zhou<sup>a</sup>, Ting-Ting Song<sup>b</sup> and Mei-Hong Duan<sup>\*b</sup>

<sup>a</sup>. Chemical Synthesis and Pollution Control Key Laboratory of Sichuan Province, College of Chemistry and Chemical Engineering, China West Normal University, Nanchong 637002, China

<sup>b</sup>. College of Physics and Astronomy, China West Normal University, Nanchong 637002, China, mail: duanmeihong@126.com

<sup>c</sup>. State Key Laboratory of Structural Chemistry, Fujian Institute of Research on the Structure of Matter, Chinese Academy of Sciences, Fuzhou, Fujian 350002, P. R. China

#### CONTENTS

|                                                                                                                                                 |     |
|-------------------------------------------------------------------------------------------------------------------------------------------------|-----|
| <b>Table S1.</b> Atomic coordinates and equivalent isotropic displacement parameters for $(\text{NH}_4)_3\text{Sn}_2(\text{PO}_4)_2\text{Cl}$ . | S2  |
| <b>Table S2.</b> Anisotropic displacement parameters for $(\text{NH}_4)_3\text{Sn}_2(\text{PO}_4)_2\text{Cl}$ , in $\text{\AA}^2$ .             | S3  |
| <b>Table S3.</b> Selected bond lengths for $(\text{NH}_4)_3\text{Sn}_2(\text{PO}_4)_2\text{Cl}$ .                                               | S4  |
| <b>Table S4.</b> Selected bond angles for $(\text{NH}_4)_3\text{Sn}_2(\text{PO}_4)_2\text{Cl}$ .                                                | S5  |
| <b>Table S5.</b> Bond valence sums (BVS) for $(\text{NH}_4)_3\text{Sn}_2(\text{PO}_4)_2\text{Cl}$ .                                             | S6  |
| <b>Figure S1.</b> Measured and calculated PXRD patterns for $(\text{NH}_4)_3\text{Sn}_2(\text{PO}_4)_2\text{Cl}$ .                              | S7  |
| <b>Figure S2.</b> Measured TG curve for $(\text{NH}_4)_3\text{Sn}_2(\text{PO}_4)_2\text{Cl}$ .                                                  | S8  |
| <b>Figure S3.</b> IR spectrum for $(\text{NH}_4)_3\text{Sn}_2(\text{PO}_4)_2\text{Cl}$ .                                                        | S9  |
| <b>Figure S4.</b> EDS map for $(\text{NH}_4)_3\text{Sn}_2(\text{PO}_4)_2\text{Cl}$ .                                                            | S10 |

**Table S1.** Atomic coordinates and equivalent isotropic displacement parameters for  $(\text{NH}_4)_3\text{Sn}_2(\text{PO}_4)_2\text{Cl}$ .

| Atom | x/a         | y/b         | z/c         | Ueq [Å <sup>2</sup> ] | S.O.F.    | Wyckoff |
|------|-------------|-------------|-------------|-----------------------|-----------|---------|
| Sn1  | 0.61623(4)  | 0.34466(4)  | 0.37526(4)  | 0.02020(17)           | 1         | 4d      |
| P1   | 0.34477(16) | 0.36179(15) | 0.53080(14) | 0.0189(4)             | 1         | 4d      |
| Cl1  | 0.5         | 0.0386(9)   | 0.25        | 0.118(3)              | 0.802(13) | 8d      |
| O1   | 0.4253(5)   | 0.3038(5)   | 0.4422(4)   | 0.0314(12)            | 1         | 4d      |
| O3   | 0.3261(5)   | 0.5137(4)   | 0.5146(4)   | 0.0257(11)            | 1         | 4d      |
| O2   | 0.2000(4)   | 0.2976(4)   | 0.5259(4)   | 0.0264(11)            | 1         | 4d      |
| O4   | 0.4144(6)   | 0.3331(5)   | 0.6278(4)   | 0.0402(14)            | 1         | 4d      |
| N2   | 0.6962(7)   | 0.3401(7)   | 0.6766(5)   | 0.048(2)              | 1         | 4d      |
| H2A  | 0.746423    | 0.341314    | 0.62118     | 0.058                 | 1         | 4d      |
| H2B  | 0.714013    | 0.413514    | 0.71205     | 0.058                 | 1         | 4d      |
| H2C  | 0.717753    | 0.267654    | 0.71205     | 0.058                 | 1         | 4d      |
| H2D  | 0.604683    | 0.337914    | 0.66075     | 0.058                 | 1         | 4d      |
| N1   | 0           | 0.5         | 0.5         | 0.080(5)              | 1         | 8d      |
| H1A  | -0.01353    | 0.51373     | 0.43541     | 0.096                 | 0.5       | 4d      |
| H1B  | -0.07918    | 0.47475     | 0.52815     | 0.096                 | 0.5       | 4d      |
| H1C  | 0.02955     | 0.57559     | 0.52815     | 0.096                 | 0.5       | 4d      |
| H1D  | 0.06458     | 0.43449     | 0.50847     | 0.096                 | 0.5       | 4d      |
| Cl2  | 0.916(5)    | 0.571(3)    | 0.694(3)    | 0.14(2)               | 0.099(6)  | 4d      |

**Table S2.** Anisotropic displacement parameters for  $(\text{NH}_4)_3\text{Sn}_2(\text{PO}_4)_2\text{Cl}$ , in  $\text{\AA}^2$ .

| Atom | U11       | U22       | U33        | U12         | U13         | U23          |
|------|-----------|-----------|------------|-------------|-------------|--------------|
| Sn1  | 0.0203(2) | 0.0209(3) | 0.0194(3)  | 0.00118(17) | 0.00197(18) | -0.00050(19) |
| P1   | 0.0156(7) | 0.0164(7) | 0.0247(10) | -0.0016(6)  | 0.0008(7)   | 0.0006(7)    |
| Cl1  | 0.087(4)  | 0.188(8)  | 0.077(5)   | 0.00000     | 0.029(4)    | 0.00000      |
| O1   | 0.018(2)  | 0.033(3)  | 0.042(3)   | -0.005(2)   | 0.008(2)    | -0.012(3)    |
| O3   | 0.034(3)  | 0.014(2)  | 0.030(3)   | -0.001(2)   | 0.001(2)    | 0.0009(19)   |
| O2   | 0.019(2)  | 0.021(2)  | 0.039(3)   | -0.0048(19) | 0.003(2)    | 0.004(2)     |
| O4   | 0.032(3)  | 0.056(4)  | 0.033(3)   | 0.000(3)    | -0.010(2)   | 0.015(3)     |
| N2   | 0.047(4)  | 0.070(5)  | 0.028(4)   | 0.023(4)    | -0.007(3)   | -0.001(4)    |
| N1   | 0.022(5)  | 0.056(7)  | 0.161(15)  | 0.005(5)    | 0.006(7)    | 0.052(8)     |
| Cl2  | 0.24(5)   | 0.052(17) | 0.14(4)    | 0.09(2)     | -0.13(4)    | -0.05(2)     |

**Table S3.** Selected bond lengths for  $(\text{NH}_4)_3\text{Sn}_2(\text{PO}_4)_2\text{Cl}$ .

| Atom 1,2 | d 1,2 [Å] |
|----------|-----------|
| Sn1-O1   | 2.093(5)  |
| Sn1-O3   | 2.122(5)  |
| Sn1-O2   | 2.106(5)  |
| P1-O1    | 1.537(5)  |
| P1-O3    | 1.540(4)  |
| P1-O2    | 1.539(4)  |
| P1-O4    | 1.497(6)  |

**Table S4.** Selected bond angles for  $(\text{NH}_4)_3\text{Sn}_2(\text{PO}_4)_2\text{Cl}$ .

| <b>Atom 1,2,3</b> | <b>Angle 1,2 ,3[°]</b> |
|-------------------|------------------------|
| O1-Sn1-O3         | 93.41(18)              |
| O1-Sn1-O2         | 86.32(19)              |
| O2-Sn1-O3         | 84.52(18)              |
| O1-P1-O3          | 108.6(3)               |
| O1-P1-O2          | 105.7(3)               |
| O2-P1-O3          | 107.2(3)               |
| O4-P1-O1          | 112.2(3)               |
| O4-P1-O3          | 111.4(3)               |
| O4-P1-O2          | 111.5(3)               |
| P1-O1-Sn1         | 135.0(3)               |
| P1-O3-Sn1         | 121.6(3)               |
| P1-O2-Sn1         | 127.0(3)               |

**Table S5.** Bond valence sums (BVS) for  $(\text{NH}_4)_3\text{Sn}_2(\text{PO}_4)_2\text{Cl}$ .

| <b>Atom</b> | <b>BVS</b> |
|-------------|------------|
| Sn1         | 2.15       |
| P1          | 5.07       |
| O1          | -1.99      |
| O2          | -1.95      |
| O3          | -1.92      |

**Figure S1.** Measured and calculated PXRD patterns for  $(\text{NH}_4)_3\text{Sn}_2(\text{PO}_4)_2\text{Cl}$ .

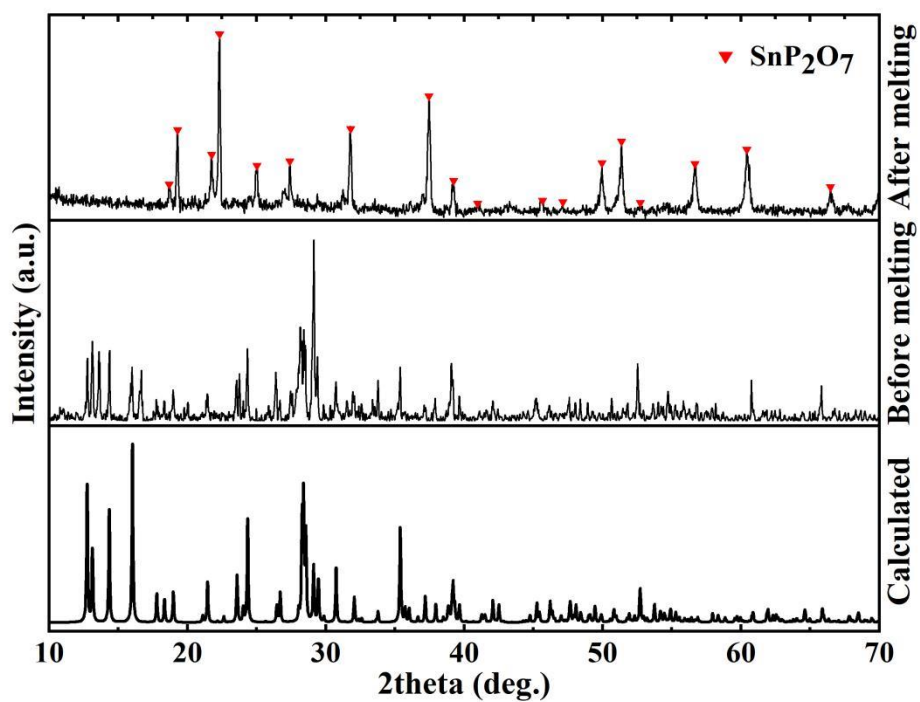

Figure S2. Measured TG curve for  $(\text{NH}_4)_3\text{Sn}_2(\text{PO}_4)_2\text{Cl}$ .

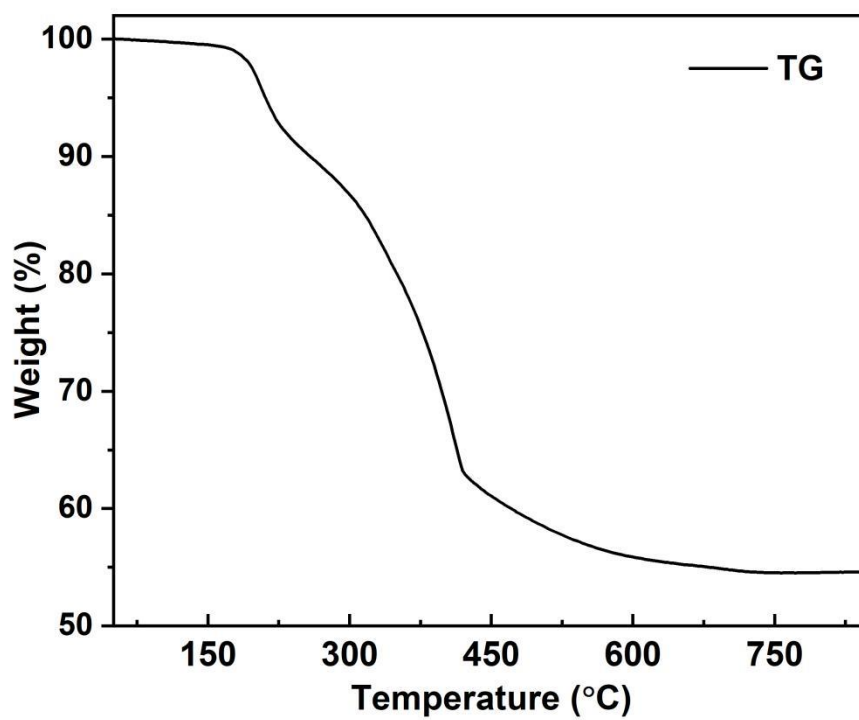



Figure S3. IR spectrum for  $(\text{NH}_4)_3\text{Sn}_2(\text{PO}_4)_2\text{Cl}$ .

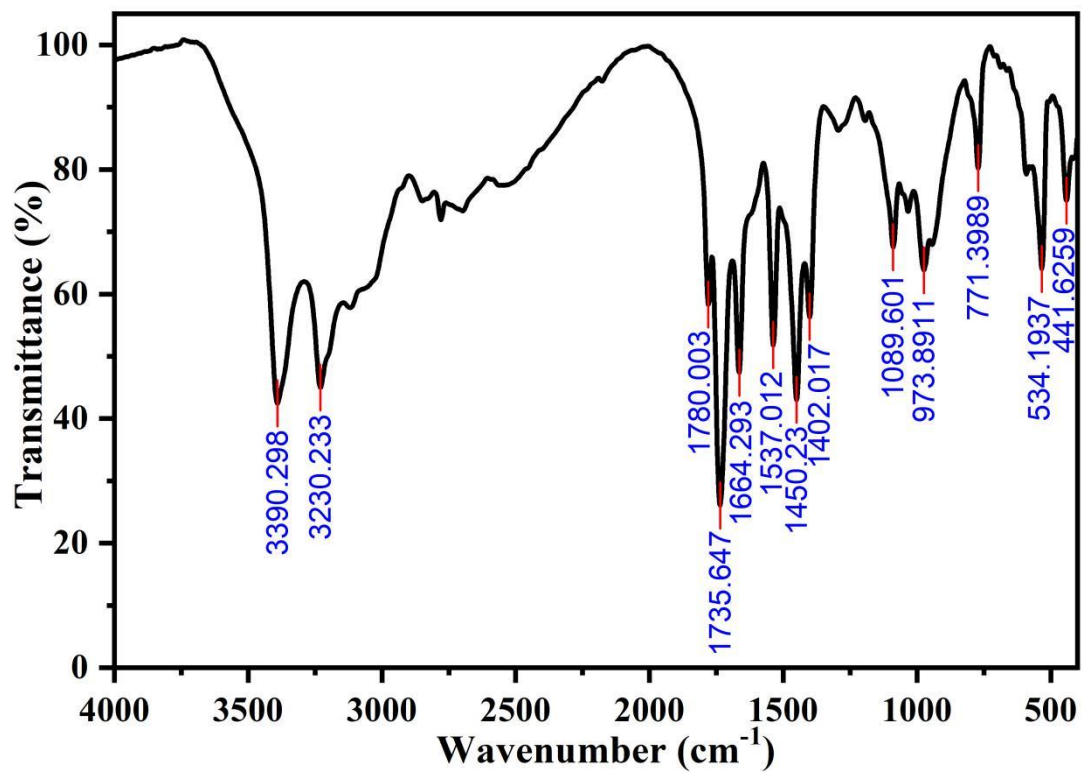

**Figure S4.** EDS map for  $(\text{NH}_4)_3\text{Sn}_2(\text{PO}_4)_2\text{Cl}$ .

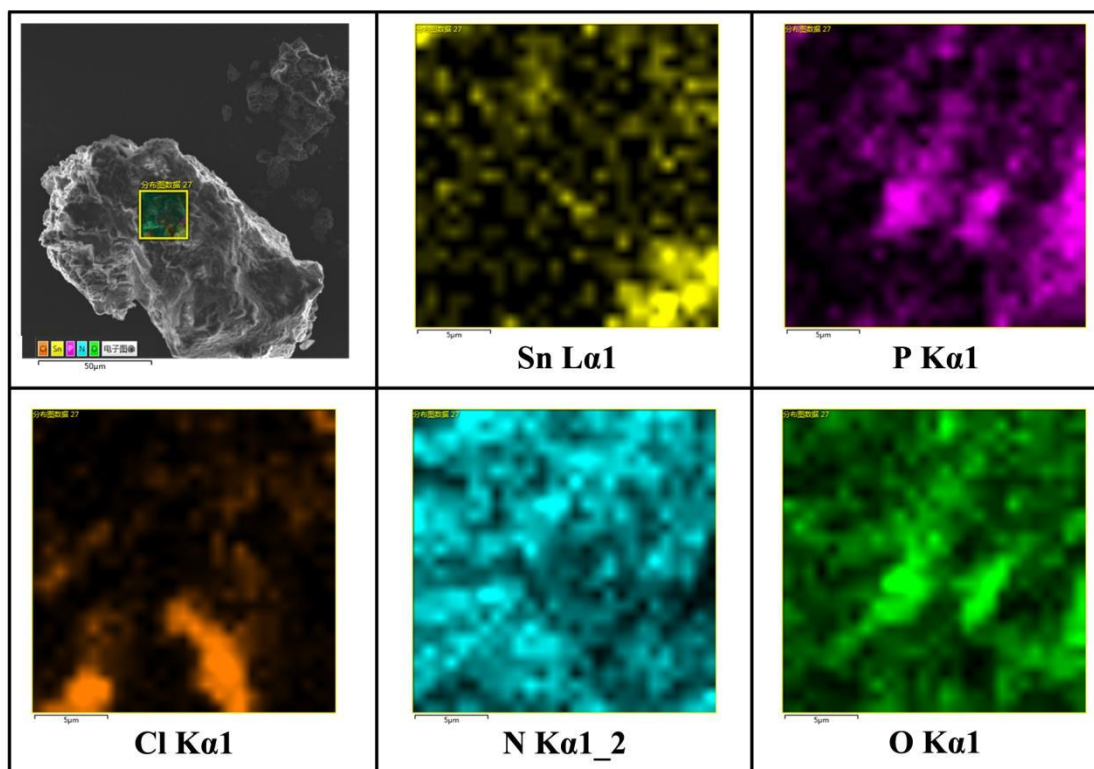

Supplement: d3qi02561f1.pdf [file d3qi02561f1.pdf]
